# Supplementary material for: Transcriptome analysis highlights key differentially expressed genes involved in cellulose and lignin biosynthesis of sugarcane genotypes varying in fiber content
Source: PubMed Central journal article supplement (PMC6072797; doi:10.1038/s41598-018-30033-4), 2018-08-02
Supplement: 41598_2018_30033_MOESM6_ESM.pdf [file 41598_2018_30033_MOESM6_ESM.pdf]

# **Transcriptome analysis highlights key differentially expressed genes involved in cellulose and lignin biosynthesis of sugarcane genotypes varying in fiber content**

Lakshmi Kasirajan<sup>1,2,†</sup>, Nam V. Hoang<sup>1,3,†</sup>, Agnelo Furtado<sup>1</sup>, Frederik C. Botha<sup>1,4</sup> and Robert J.

Henry<sup>1\*</sup>

<sup>1</sup>Queensland Alliance for Agriculture and Food Innovation, The University of Queensland, St. Lucia, Queensland, Australia, 4072. <sup>2</sup>ICAR-Sugarcane Breeding Institute, Coimbatore 641007, Tamil Nadu, India. <sup>3</sup>College of Agriculture and Forestry, Hue University, Hue, Vietnam. <sup>4</sup>Sugar Research Australia, Indooroopilly, Queensland, Australia. 4068.

\*Corresponding author: **Robert J. Henry**, Level 2, The John Hay Building, Queensland Biosciences Precinct [#80], 306 Carmody Road, The University of Queensland, St Lucia QLD 4072.

Email: [robert.henry@uq.edu.au](mailto:robert.henry@uq.edu.au), Tel: +61 7 3346 0551,| Fax: +61 7 334 60555

†These authors contributed equally to this work

**Lakshmi Kasirajan**

Email: [K.Lakshmi@icar.gov.in](mailto:K.Lakshmi@icar.gov.in),

**Nam V. Hoang**

Email: [hoang.nam@uq.net.au](mailto:hoang.nam@uq.net.au)

**Agnelo Furtado**

Email: [a.furtado@uq.edu.au](mailto:a.furtado@uq.edu.au)

**Frederick C. Botha**

Email: [f.botha@uq.edu.au](mailto:f.botha@uq.edu.au)

# ADDITIONAL METHODS

**Bioanalyser profiles of 40 internodal RNA samples used in this study.** Left panel: top internodal samples, right panel: bottom internodal samples (adapted from<sup>1</sup>).

| TOP INTERNODAL SAMPLES |              |     |                  |                        |                     |       |
|------------------------|--------------|-----|------------------|------------------------|---------------------|-------|
| Sample                 | CODE         | RIN | RNA Con. (ng/μl) | rRNA Ratio [25e / 18s] | Total (μg) in 50 μl |       |
| 1                      | QC02-402     | T1  | 8.0              | 1776.3                 | 1.8                 | 88.8  |
| 2                      | QA02-1009    | T2  | 8.1              | 505.4                  | 1.9                 | 25.3  |
| 3                      | QN05-1460    | T3  | 8.2              | 1788.0                 | 2.0                 | 39.4  |
| 4                      | QN05-1743    | T4  | 8.0              | 678.5                  | 1.9                 | 33.9  |
| 5                      | QN05-1509    | T5  | 8.1              | 575.2                  | 1.8                 | 28.8  |
| 6                      | QS09-2014    | T6  | 8.0              | 1011.2                 | 1.9                 | 50.6  |
| 7                      | QA06-1740    | T7  | 6.1              | 637.3                  | 1.9                 | 31.9  |
| 8                      | Q241         | T8  | 8.2              | 1404.2                 | 1.9                 | 70.2  |
| 9                      | Q200         | T9  | 8.0              | 1792.9                 | 1.8                 | 89.6  |
| 10                     | QN05-803     | T10 | 8.0              | 2063.2                 | 1.9                 | 103.2 |
| 11                     | KQB07-23863  | T11 | 7.8              | 1257.0                 | 1.7                 | 62.9  |
| 12                     | KQB08-32953  | T12 | 8.2              | 1290.7                 | 2.1                 | 64.5  |
| 13                     | KQB07-23990  | T13 | 8.1              | 618.6                  | 2.0                 | 30.9  |
| 14                     | KQB8-2850    | T14 | 8.1              | 399.3                  | 1.9                 | 20.0  |
| 15                     | KQB07-24619  | T15 | 8.5              | 963.7                  | 1.9                 | 48.2  |
| 16                     | KQB07-24739  | T16 | 7.5              | 529.4                  | 1.5                 | 26.5  |
| 17                     | QBY104-26041 | T17 | 7.8              | 301.4                  | 1.7                 | 15.1  |
| 18                     | KQB09-23137  | T18 | 7.8              | 392.1                  | 1.8                 | 19.6  |
| 19                     | KQB09-20620  | T19 | 8.0              | 1008.9                 | 1.9                 | 50.4  |
| 20                     | KQB09-20432  | T20 | 8.0              | 581.3                  | 1.8                 | 28.1  |

| BOTTOM INTERNODAL SAMPLES |              |     |                  |                        |                     |      |
|---------------------------|--------------|-----|------------------|------------------------|---------------------|------|
| Sample                    | CODE         | RIN | RNA Con. (ng/μl) | rRNA Ratio [25e / 18s] | Total (μg) in 50 μl |      |
| 1                         | QC02-402     | B1  | 8.3              | 478.1                  | 1.8                 | 24.0 |
| 2                         | QA02-1009    | B2  | 8.5              | 833.6                  | 1.8                 | 41.7 |
| 3                         | QN05-1460    | B3  | 8.3              | 864.4                  | 1.9                 | 43.2 |
| 4                         | QN05-1743    | B4  | 7.7              | 380.0                  | 1.9                 | 19.0 |
| 5                         | QN05-1509    | B5  | 8.3              | 282.6                  | 2.3                 | 13.1 |
| 6                         | QS09-2014    | B6  | 7.8              | 413.8                  | 1.9                 | 20.7 |
| 7                         | QA06-1740    | B7  | 7.8              | 534.3                  | 1.9                 | 26.7 |
| 8                         | Q241         | B8  | 8.6              | 1050.4                 | 2.0                 | 52.5 |
| 9                         | Q200         | B9  | 8.2              | 1283.8                 | 1.7                 | 64.2 |
| 10                        | QN05-803     | B10 | 8.1              | 684.6                  | 2.2                 | 34.2 |
| 11                        | KQB07-23863  | B11 | 8.1              | 632.5                  | 2.2                 | 31.6 |
| 12                        | KQB08-32953  | B12 | 8.2              | 770.7                  | 2.0                 | 38.5 |
| 13                        | KQB07-23990  | B13 | 8.1              | 269.1                  | 2.1                 | 18.5 |
| 14                        | KQB8-2850    | B14 | 8.0              | 442.8                  | 2.0                 | 22.1 |
| 15                        | KQB07-24619  | B15 | 8.5              | 856.3                  | 1.9                 | 42.8 |
| 16                        | KQB07-24739  | B16 | 8.4              | 865.5                  | 1.9                 | 43.3 |
| 17                        | QBY104-26041 | B17 | 7.9              | 714.0                  | 2.2                 | 35.7 |
| 18                        | KQB09-23137  | B18 | 8.2              | 902.7                  | 2.0                 | 45.1 |
| 19                        | KQB09-20620  | B19 | 8.6              | 539.2                  | 2.1                 | 27.0 |
| 20                        | KQB09-20432  | B20 | 8.1              | 1021.9                 | 2.0                 | 51.1 |

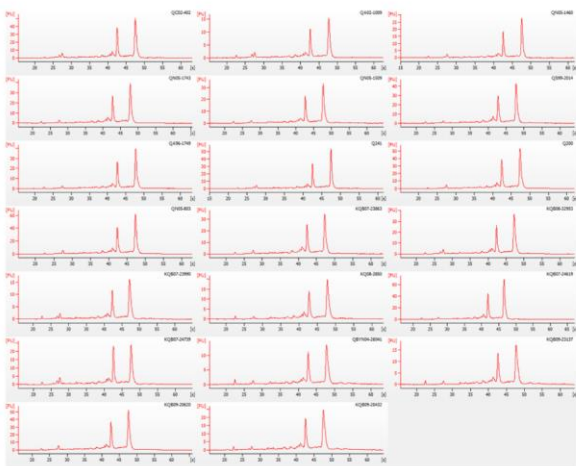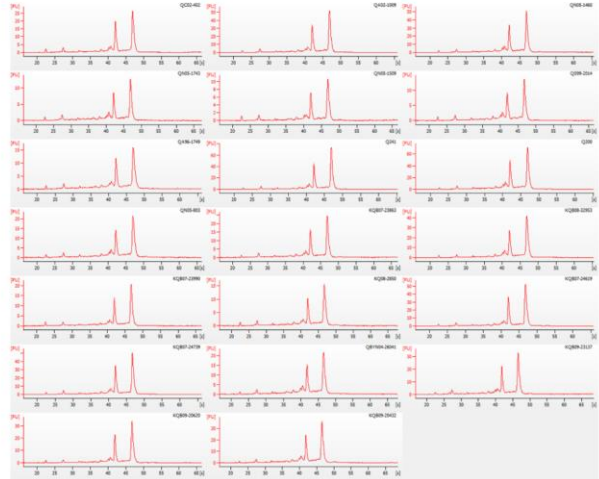

**Summary statistics of *Saccharum officinarum* gene index (SoGI) database**

([ftp://occamsdfciharvardedu/pub/bio/tgi/data/Saccharum\\_officinarum](ftp://occamsdfciharvardedu/pub/bio/tgi/data/Saccharum_officinarum))

| <b>Statistics</b>                     | <b>SoGI</b> |
|---------------------------------------|-------------|
| Number of sequences ( $\geq 0$ bp)    | 121,342     |
| Number of sequences ( $\geq 1000$ bp) | 13,279      |
| Number of sequences ( $\geq 5000$ bp) | 0           |
| Total length ( $\geq 0$ bp)           | 88,397,709  |
| Total length ( $\geq 1000$ bp)        | 16,570,859  |
| Total sequences                       | 121,342     |
| Largest sequence                      | 4,854       |
| Total length                          | 88,397,709  |
| GC (%)                                | 52          |
| N50                                   | 729         |
| N75                                   | 641         |
| L50                                   | 46,463      |
| L75                                   | 78,851      |
| # N's                                 | 125,596     |
| # N's per 100 kbp                     | 142         |

## qPCR primers and amplicon length from SoGI and SUGIT database

### 1. SoGI - TC113051 UniRef100\_O82056 Cluster: Cinnamyl alcohol dehydrogenase; n=1; *Saccharum officinarum*

|                |                       |
|----------------|-----------------------|
| N5_CAD_Forward | GTTCTTGCCGTTCTGTTCTGG |
| N5_CAD_R       | CCACATCCTGGCGTACTTCG  |

CGGCACGAGAGGCGCACTAGTTGTCGCGCTGCTTGCTTTCTTTCCGAAGGCTAAGCCACCCGGCCGGCTCGCTCGTCT  
CCATCGCCCGCTCCCTCCGGGCTCCGCCCGCTCCGTGAGTCGTCTTCCCCGCGCCGCCCGCCGTAGCAGTCGATCGC  
GGCCGGTCCCAACTCCAGGAAGAGAATGGGGAGCCTGGCGTCCGAGAGGAAGGTGGTCGGGTGGGCCCGCCAGGG  
ACGCCACCGGACACCTCGCCCCCTACACCTACACCCTCAGGAGCACAGGCCCTGAAGATGTGGTGGTGAAGGTGCTCT  
ACTGTGGGATCTGCCACACAGACATCCACCAGGCCAAGAACCACCTCGGGGCTTCAAAGTACCCCATGGTCCCTGGGC  
ACGAGGTGGTCGGTGAGGTGGTGGAGTCCGGGCCGAGGTGACCAAGTACGGCGTCGGCGACGTGGTAGGCGTCG  
GGGTGATCGTCGGGTGCTGCCGCGAGTGCAACCCTGCAAGGCCAACGTTGAGCAGTACTGCAACAAGAAGATCTGG  
TCCTACAACGATGTCTACACTGACGGCCGGCCACGCAGGGCGGCTTCGCTCCACCATGGTCGTCGACCAGAAGTTT  
GTGATGAAGATCCCGCGGGTCTGGCGCCGAGCAAGCGGCGCCGCTGCTGTGCGCGGGCGTGACGGTGTACAGCC  
CGCTGAAAGCCTTTGGGCTGACGACCCCGGGCTCCGTGGCGGATCCTGGGCCTCGGCGGCGTGGGCCACATGGGC  
GTGAAGGTGGCCAAGGCCATGGGCCACCACGTGACGGTGTACAGCTCGTCGTCCAAGAAGCGCGCGGAGGCGATGG  
ACCACCTGGGCGCGGACGCGTACCTGGTGAGCTCGGACGCGGCGGCCATGGCGGCGGCCCCCGACTCGCTGGACTA  
CATCATCGACACGGTGCCCGTGACCACCCGCTGGAGCCCTACCTGGCGCTGCTGAAGCTGGACGGCAAGCACGTTCT  
GCTGGGCGTCATCGGCGAGCCCTCAGCTTCGTGTCCCAATGGTGTGCTGGGGCGGAAGGCCATCACGGGGAGCT  
TCATCGGCAGCATCGACGAGACCGCCGAGGTGCTCCAGTTCTGCGTCGACAAGGGGCTCACCTCCAGATCGAGGTG  
GTCAAGATGGGGTACGTGAACGAGGCGCTGGATCGGCTGGAGCGCAACGACGTCCGCTACCGCTTCGTCGTCGACGT  
CGCCGGCAGCAACGTCGAGGAGGTGGCGGCCGATGCGCCGAGCAACTGACGTGCGGCTGCGTCGTCGAACCGTGA  
GGGGAGGTTGTGCCCCGCTGCAACGTTGTTGTCGTCGAGGCTGCGTGCCTTCTGCTTCTTTAGTAGTTGTGGGC  
TTGTCGCG**GTTCTTGCCGTTCTGTTCTGG**GCTTTCAGATGAGCTGATGGATGGTCTGTTAAATGTCATCAGACTAAATA  
ACTATGTTAGTACTGTAGTACGTTTAACT**CGAAGTACGCCAGGATGTGG**TGTGGTGTACCAGCAATCTGGATTT  
GCCAAGTGTGAAGTGTCTCTTTTTCTTC

**Amplicon = 124 bp**

### SUGIT Cinnamyl alcohol dehydrogenase

ACCCTACTACCCAAAAAGACAGGCGCACTAATTGTCGCGCTGCTTGCTTTCTTTCCGAAGGCTAAGCCACCCGGCCG  
GCTCGCTCGTCTCCATCGCCCGCTCCCTCCGGGCTCCGCCCGCTCCGTGCGTCTTCCCCGCGCCGCCCGCCGTA  
GCAGTCGATCGCGGCCGGTCCCAACTCCAGGAAGAGAATGGGGAGCCTGGCGTCCGAGAGGAAGGTGGTCGGGT  
GGGCCCGCCAGGGACGCCACCGGACACCTCGCCCCCTACACCTACACCCTCAGGAGCACAGGCCCTGAAGATGTGGT  
GTGAAGGTGCTCTACTGTGGGATCTGCCACACAGACATCCACCAGGCCAAGAACCACCTCGGGGCTTCAAAGTACCC  
ATGGTCCCTGGGCACGAGGTGGTCGGTGAGGTGGTGGAGGTCGGGCCGAGGTGACCAAGTACGGCGTCGGCGAC  
GTGGTAGGCGTCGGGGTGTGTCGGGTGCTGCCGCGAGTGCAACCCTGCAAGGCCAACGTTGAGCAGTACTGCA  
ACAAGAAGATCTGGTCTACAACGATGTCTACACTGACGGCCGGCCACGCAGGGCGGCTTCGCTCCACCATGGTCG  
TCGACCAGAAGTTTGTGATGAAGATCCCGGCGGGTCTGGCGCCGAGCAAGCGGCGCCGCTGCTGTGCGCGGGCGT  
GACGGTGTACAGCCGCTGAAAGCCTTTGGGCTGACGACCCCGGCCCTCCGTGGCGGATCCTGGGCCTCGGCGGCG  
TGGGCCACATGGGCGTGAAGGTGGCCAAGGCCATGGGCCACCACGTGACGGTGTACAGCTCGTCGTCCAAGAAGCG  
CGCGGAGGCGATGGACCACCTGGGCGCGGACGCGTACCTGGTGAGCTCGGACGCGGCGGCCATGGCGGCGGCCG

CGACTCGCTGGACTACATCATCGACACGGTGCCCGTGCACCACCCGCTGGAGCCCTACCTGGCGCTGCTGAAGCTGGA  
 CGGCAAGCACGTTCTGCTGGGCGTCATCGGCGAGCCCCTCAGCTTCGTGTCCCAATGGTGATGCTGGGGCGGAAGG  
 CCATCACGGGGAGCTTCATCGGCAGCATCGACGAGACCGCCGAGGTGCTCCAGTTCTGCGTCGACAAGGGGCTCACC  
 TCCAGATCGAGGTGGTCAAGATGGGGTACGTGAACGAGGCGCTGGATCGGCTGGAGCGCAACGACGTCCGCTACC  
 GCTTCGTGTCGACGTCGCCGCGAGCAACGTCGAGGAGGTGGCGGCCGATGCGCCGAGCAACTGACGTGCGCGCTG  
 CGTCGTGAACCGTGAGGGGAGGTTGTGCCCCGCGTGCAACGTTCTGTTCTGTCGAGGCTGCGTGCCTTCTGTTCC  
 TTTAGTAGTTGTGGCTTGTGCGC**GTTCTTGCCGTTCTGTTCTGG**GCTTTCAGATGAGCTGATGGATGGTCTGTTAAAT  
**GTCATCAGACTGAATAACTATGTGTAGTACTGTAGTACGTTTTATACTCGAAGTACGCCAGGATGTGG**TGTGGTGTCA  
 CCAGCAATCTGGATTTTTTTTTATAGAACATACTGCATTATAGTTAAGG

**Amplicon = 124 bp**

**2. SoGI - CA165461 homologue to UniRef100\_O82055 Cluster: Cinnamoyl-CoA reductase; n=1; Saccharum officinarum**

|                |                        |
|----------------|------------------------|
| N7_CCR_Forward | GTAGTAGTGCCGAAGCAGAAAG |
| N7_CCR_Reverse | CCTAGCTACCAACTCGGTCATC |

CGATCGCAAGAGAGAATCCTGCCAAA**CCTAGCTACCAACTCGGTCATC**ACATCACTCGACCGCACACAAAGGGGA  
**ACCTAAAACTAACTCTCTTCAACTTCTCTGCTTTCTGCTTCTGCTTCTTATCATCATCGCCGCGCCAAGATGACCGTCGTC**  
 GCTTTCGTGACGAACTAGCTAAAGAGGAACAGCTGGTCGGTCTCTTATCATCATCGCCGCGCCAAGATGACCGTCGTC  
 GACGCCGTGTCCACTGATGCCGCCGCGCCCTGCAGCCGCCGCGGCACCGGTGCAGCAGCCCGGGAACGGGCAGA  
 CCGTGTGCGTACCGGCGCGGCCGGGTACATCGCCTCGTGGCTGGTCAAGCTGCTGCTCGAGAAGGGATACTACTGTC  
 AAGGGAACCGTCAGGAACCCAGATGACCCGAAGAACGCGCACCTCAAGGCGCTGGACGGCGCCCGGAGCGGCTGA  
 TCCTCTGCAACGCCGACCTCCTGCACTACGACGCCATCTGGCGCCCCGTGCAGGCGTGCCATGGCGTTCTTCCACACCG  
 CCCCCCGTACCGACGACCCCCGATCAAAATGGTTGAACCCTGCCGGTGCAGCGGGGCTACGACATAACTCTATCCA  
 CCCGCGAGGCGGAAGCCCGGAACCCGTGCAGCGAGGTGGTGTTCACCTCCTCCC

**Amplicon = 106 bp**

**SUGIT Cinnamoyl-CoA reductase**

TTTTTTTTTTTTTTTTTTTTTTTTCTAGAAATAAATGAACATTAGCCATTTTTATTCACTCATCACTATAGTCCACAAGAACGA  
 ACATGACGTTACAACAAGCTTAGGGTAGGGTATCAGCCACCGAACAAACTAGTTTGTTTACACAGCTGGGGCAG  
 GGCTGTATGAACATTGCTTTTCTGTTTCATGTGTACGTGGCATCTCTCTCTCACGCACGGATGGCGATTCTCCCTGCTGC  
 AGCTCGGCGGGCGGGGGCCGCTCCTTGTGTCGCGCCTCCGTGCTGCTCTCCGAGCACCAGGAGGTGGCCCTTC  
 TCCTGAAGTTTCTCACCGTGTGTCGACAGCGACTGGCTCACCGGCCGGAACCTCAGCCCCAGGTCCCGGAGCTTCTGG  
 TTCGAGAAGTTGTACGGCTGCTTCCGCGGGTTCACCTCGTCCGAGCACCTGGTGGGGACGGGGTACTCGGGGAAGAG  
 CTTGGCGAGGATGCGGACGACGTCTCGCGGTGGAGGACGCGCTCGGCGCAGAGGTATCGGCCGACGCGCGCGG  
 GCTCTCGAAGACGCGGAGGTGCGCGTCCGCGACGTGCGGACGTCCACGTACGCCTGCACGGCGTTGGCGAAGGTG  
 CGCGCGGAGCCGTCCAGTACTTGGCCACGTGCGCGATGCTGGCGTTCACCGTCCGCTGCAGCAGTGGGCCACAC  
 CAGCACCAGGTTACCACCACCAGTCCACGCCGCGCTGCCGGCCGCGTCCACGCCGCTGCTCCGCCACCGCCTT  
 GCCGTAGCAGTACCAGTTCCTGGTTTTCTGCAAGAACTCGAGTTCGCTCCAGCACGACTCGTCGACCACGACGTCCGG  
 CCCGCGGCTGGGGTCCATGGTACCAGCGCCGATGGAGGACGTGAACACCACCCGCCGACCGTCCCGGCTCCGCCG  
 CCGGTTGATCACGTAATCCGTGCCGCGCACCGCCGGTCCACATTTGCTCCGGGTCGTGCGGTGACCGGGGAGGCG  
 GTGTGGAAGACGCCATGGCAGCCCTGCACGGCGCGGCAGATGGCGTGTAGTCAAGGAGGTCGGCCTTGCAGAGGA

TCAGCCGCTCGGGCGGCGCCGTCCAGCGCCTTGAGGTGCGGTTCTTCGGGTCATCTGGGTTCTGACGGTTCCCTTGA  
CAGTGTATCCCTTCTCGAGCAGCAGCTTGACGAGCCACGAGGCGATGTACCCGGCCGCGCCGGTGACACACACAGTC  
TGCCCGTTCCCGCGGGCTGCACAGGCGCCGCGGCGCAGCTGGGGCGCCGCGGCATCAGTGGACACGGCGTCGA  
CGATGGTCATCTTGGCGCGGCGATGATGATAAGAGACCGACCAGCTGTTCTCTTTAGCTAGTTTCGTACGAAAGCTA  
GCTAGCTCGCGGTGTGTCTCGTAGTA**GTAGTAGTGCCGAAGCAGAAAG**GCAGAGGAAGTTGAAGAGAGTTAGTTTT  
**TAGGTTAATTTCCCTTTGTGTGTGCGGTGCGAGTGATGAGATGACCGAGTTGGTAGCTAGG**TTTGGTAGGATTCTTTC  
TTGCGGTGATAATCCTCCCATGTACCTCATGCGTTGATACCACTTACGCCGCTATATCAGAAGTGAAGAGAGTGAG  
AGAGTAGAATCAGAGTCATATCACACAGGACGCAGATGTAGAGGAGAGTGTGTGTACGTCACCACCAGTATGCTATA  
GACAGGTATTACCGACAGATCAAACATTCGTCGAGCGAGGCTACCAATAGCTGATCGATAGAGGTAGATAACATCTC  
GTGCCTCACAAGAACGCGCCACGAGAGTCCCACAGGAGAATAGGCTTCTGTGAGTATGAGGACGCATAAAACGGATA  
TCAGATGTCACACCCGCGTCCGCCGGAGTAACGAGAAGCACTAGTCGATTGAGACTATTGAGGACGAACGAGACA  
CACCGCGAGCTAGCTAGCTTTCGTGACGAACTAGCTAAAGAGGAACAGCTGGTGGTCTCTTATCATCATCGCCGCGC  
CAAGATGACCATCGTCGACGCCGTGCCACTGATGCCGCCGCGCCCCAGCTGCCGCCGCGGCGCCGGTGCAGCCCG  
CGGGGAACGGGCAGACTGTGTGTGTACCCGGCGCGGCCGGGTACATCGCCTCGTGGCTCGTCAAGCTGCTGCTCGAG  
AAGGGATACACTGTCAAGGGAACCGTCAGGAACCCAGATGACCCGAAGAACGCGCACCTCAAGGCGCTGGACGGCG  
CCGCCGAGCGGCTGATCCTCTGCAAGGCCGACCTCCTGGACTACGACGCCATCTGCCGCGCCGTGCAGGGCTGCCAT  
GGCGTCTCCACACCGCCTCCCGGTACCCGACGACCCGGAGCAAATGGTGGAGCCGGCGGTGCGCGGCACGGAGT  
ACGTGATCAACGCGGCGGCGGAGGCCGGCACGGTGGCGGGTGGTGTTCACGTCCTCCATCGGCGCGGTGACCAT  
GGACCCAGCCGCGGGCCCGACGTCGTGGTGCAGAGTCGTGCTGGAGCGACCTCGAGTTCTGCAAGAAAACAGG  
AACTGGTACTGCTACGGCAAGGCGGTGGCGGAGCAGGCGGCGTGGGACGCGCCCCGGCAGCGCGGCGTGGACCTG  
GTGGTGGTGAACCCGGTGTGGTGGTGGGCCCGTGTGTCAGCCGACGGTGAACGCCAGCATCGCGCACGTGGCCA  
AGTACCTGGACGGCTCCGCGCGCACCTTCGCCAACGCCGTGCAGGCGTACGTGGACGTCCGCGACGTGCGCCGACGCG  
CACCTCCGCGTCTTCGAGAGCCCGCGCGTCCGGCCGATACCTCTGCGCCGAGCGCGTCTCCACCGCGAGGACGTC  
GTCCGCATCCTCGCCAAGCTCTTCCCGAGTACCCCGTCCCACCAGGTGCTCCGACGAGGTGAATCCGCGGAAGCAG  
CCGTACAAGTTCTCGAACCAGAAGCTCCGGGACCTGGGGCTGGAGTTCCGGCCGGTGAAGCCAGTCGCTGTACGACAC  
GGTGAAGAACCTTCAGGAGAAGGGCCACCTGCCGGTGTCTGGAGAGCAGACGACGGAGGCCGACGACAAGGAGGC  
GGCCCCCGCCCGCCGAGCTGCAGCAGGGAGGAATCGCCATCCGTGCGTGAGAGAGAGATGCCACGTACACATGA  
ACAGAAAAGCAATGTTACATACAGCCCTGCCCCAGCTGTGTAACAAACTAGTGTGTTGTTGGTGGCTGATACCCCTACC  
CTAAGCTTGTGTAACGTCATGTTCTGTGGACTATAGTGATGAGTGAATAAAAATGGCTAATGTTTCATTATTTT  
C

**Amplicon = 111 bp**

**3. SoGI - TC134289 homologue to UniRef100\_Q9LLI3 Cluster: Cellulose synthase-7; n=1; Zea mays**

N8\_CesA\_Forward: CACCATCGGTAAGCTGGTG

N8\_CesA\_Reverse: AAGCCCAAATGCGAGACAG

CCGCTGACACCCTAATTCATATGGCCACAATGCTTTTGCCGTTCTTTCTTTAGCTGTCCAACGCTGCAACGATATGGTT  
TCTTGGCCCTTTCATGTCCATCATCTTGACGAGCGTGTGGAGCTGCGGTGGAGTGGCATCGGGATTGAGGACTGGT  
GGCGCAACGAGCAGTTCTGGGTCAATGGAGGTGTGTCGCGCACCTGTTCCGCGTGTTCAGGGTATTCTCAAGATGA  
TTGCCGGGCTGGACACCAACTTCACGGTCACGGCGAAGGCCACGGACGACACCGAGTTCGGGGAGCTGTACGTGTTT  
AAGTGGACAACGGTGTGATCCCGCCACCAGCATCCTGGTGTCAACCTGGTGGGCGTGGTGGCTGGCTTCTCGGC  
CGCGCTCAACAGCGGCTACGAGTCTGGGGCCCGCTTTTGCAAGGTGTTCTTCGCAATGTGGGTGATCATGCACCT  
GTACCCGTTCTCAAGGGTCTCATGGGCCGCGCAGAACCACGACGCCACCATCGTGGTGTCTGGTCCGTCCTCCTCGCC

TCCGCTTCTCCCTCCTCTGGGTCAAGATCGACCCATTCGTCCGAGGAACCGAGACCGTCAACACCAACAACACTGCAACA  
CAGTCATCTGCTGATT **CACCATCGGTAAGCTGGT**TCGGGCC

#### SUGIT Cellulose synthase

CGAGAGAAAAGACCAGGCTACCAACACCACAAGAAGGCAGGGGCTATGAATGCTCTGGTCCGAGTGTCCGCTGTTCT  
GACAAATGCACCTTACATTCTTAATCTTGACTGTGATCACTATGTTAAACAACAGCAAAGCCGTTTCGTGAAGCAATGTGC  
TTCATGATGGACCCTACTGTTGGCAGAGATGTTTGCTATGTGCAATCCCCAGAGGTTTCGATGGCATTGATCGCAGT  
GATCGATATGCCAATAGGAACGTTGTGTTCTTTGATGTTAATATGAAAGGACTTGATGGCATCCAAGGCCAGTTTAT  
GTGGGAACCTGGTTGTTGTTTCTATAGGCAGGCACCTTATGGTTATGGACCTCCATCTCTGCCTGCACTTCCAAAGTCTT  
CAATTTGTTTCGTGGTGTGCTGCTGTCCCAAGAAAAAGTTGAAAGAAGTGAGAGGGAAATCAACAGAGACTCC  
CGGCGAGAAGACCTTGAGTCTGCCATTTTAAATCTTCGTGAAATTGACAACTACGATGAGTATGAGAGGTCCATGCTG  
ATCTCTCAGATGAGCTTCGAGAAATCTTTGGGCTGTCCTCAGTCTTTATTGAATCAACTCTTATGGAGAATGGGGGCG  
TCCCTGAATCTGCAAACCCATCTACCCTAATTAAGAAGCCATTGATGTCATTAGCTGCGGATATGAAGAGAAAAGTGA  
ATGGGGAAAAGAGATTGGCTGGATCTATGGTTACAGAGGATATTCTGACTGGGTTAAGATGCAGTGCCGTG  
GCTGGAGATCCATCTACTGCATGCCGGTGAGACCTGCATTCAAGGGATCAGCCCCTATCAATCTTCCGATCGTCTTCA  
CCAGTTTCTCCGGTGGGCTCTTGGTTCTGTGAGATCTTCTCAGTCGGCACTGCCCGCTGTGGTACGGTTACGGTGG  
CGGCCGTCTGAAATGGCTCCAGAGGCTGTCCTACATCAACACCATCGTGTACCCGTTCACTTCTTCTCCTCTCGTTGCCT  
ACTGTTGCCTGCCTGCCATTTGCCTGCTCACAGGAAAGTTCATTATTCCTACGCTGTCCAACGCTGCAACGATATGGTT  
CTTGGCCTCTTCATGTCCATCATCTTGACGAGCGTGTGGAGCTGCGGTGGAGTGGCATCGGGATTGAGGACTGGTG  
GCGCAACGAGCAGTTCTGGGTCATTGGAGGTGTGTCCGCGCACCTGTTCCCGTGTTCAGGGTATTCTCAAGATGAT  
TGCCGGGCTGGACACCAACTTACGGTCACGGCGAAGGCCACGGACGACACCGATTTCCGGGAGCTGTACGTGTTCA  
AGTGGACGACGGTGTGATCCCGCCACCAGCATCCTGGTGTCAACCTGGTGGGCGTGGTGGCTGGCTTCTCGGCC  
GCGCTCAACAGCGGCTACGAGTCTGGGGCCGCTCTTGGCAAGGTGTTCTTCGCAATGTGGGTGATCATGCACCTG  
TACCCGTTCTCAAGGGTCTCATGGGCCGCCAGAACCACGACGCCACCATCGTGGTGTCTGGTCCGTCCTCCTCGCCT  
CCGCTTCTCCCTCCTCTGGGTCAAGATCGACCCATTCGTCCGAGGAACCGAGACCGTCAACACCAACAACACTGCAACA  
CAGTCATCTGCTGATT **CACCATCGGTAAGCTGGT**TCGGGCCGCGGCCGCGCTGTTTCTGGTGTTCAGCCTGATGCA  
GGCGGGTTACCTCTGTCTGTCTCGATTTGGGCTTTGCCCCAGGATCTGGGAGAGGTGGTATAGGTTAGCTCTGTTT  
TACATCCAAGTGTGATTGCTGTCTGTATTATGAAAAGTTTTGGTGTCTAAAGTGTCAAACCTCGCCTCAATTGTGAG  
AATGCACTGTTTAAAGTGTGTAAATCATAGGAACGTGGGAAAAAGGAAGTGAAGATACTTGCCTACCAAAAGGCA  
AGATCATTTACAT

#### 4. SoGI -TC130010 homologue to UniRef100\_A0EJ90 Cluster: Brittle stalk-2; n=1; Zea mays

|                  |                       |
|------------------|-----------------------|
| N3_BC1I5_Forward | CCTTCCACCTCTCATCTGTGC |
| N3_BC1I5_Reverse | TATGCCCTGCCTACTCTGC   |

CCCACGCTCCGCAAGGACGCCAGGACCTTACCTTACGCCAGGGCTGGGCTTCCCGCGCAAGATCTACTTCAACGG  
CGACGAGTGAAGATGCCACCGCCGACTCCTACCCCTACCTGCCAACGCCGCGCCCGCTGCCTCGCAGCTGAT  
CGTGTCCGCCGCCCTCAGCGTTCCTACTGGCGCTGCTCCTGGTAGCATGACCATGACCGACCAGGGCCTCCATTTCT  
TCCTTTGTTTC **CCTTCCACCTCTCATCTGTGC**CCGTCTTCAATCCCATTTCCATGATCCCATCCCGTGGGAGGGGGCAG  
**CAGAGTAGGCAGGGCATA**TTGGTTGCCAAGACTTCAACACTTGGGTTTTGCTTCGCTTAATTGCTTCGTGAGAGGGAA  
ACTGTCATGCACTGTATGTAATGTAACCTCCAGTTGCAGGTCGTGATCCCAAGACAATCAGGCTGGCAGACTTTT  
GGGTCTGCAACTACTATTAGAGAGCCTGCCTGAGCGAGAGAGAGGGGGAAAAAAGCAGACATATAGAGCATAACAG  
GTTTTCTGTTATTTGTTCTGTAAACATAATGCAGATACTCTGTTCAAATGATATACGAATCAACTTACTGGACATTAGC  
ATGCT

Amplicon = 87 bp

SUGIT BC1I5

GGGTCGGAGCTTGTGCTACCAGCTAGCAGCAGCCGTGGTGGTGTACTTACGTTCTTGCAGAGGCCGCCGGCCGGCT  
CGCTCATCGATCGATGGGGCTCCGCGACTCCTCCGCGTCTGGCTCTGGCCCTCGCCCTCGCCTACTGCTCCGTCGCA  
GGTTCAATTCGTGTCACGCCATTCCATCATCTGAAAACCAACCTTGTTTCGTTCTATCTAATGTCGATCAACGGACGAT  
GCTCACCTCTTGTGTCGATCGTCGTTCTCCTCCCTGGCTGGCTGACGGCTTGTCTCCTTGCAGTGGTGGCTACGATCC  
CCTGGACCCGAGGGGCAACATCACCATCAAGTGGGACGTGATCTCGTGGACGCCGACGGGTACGTGGCGATGGTG  
ACGATGAGCAACTACCAGATGTACCGGCACATCATGGCGCCCGGGTGGACGGTGGGGTGGTCTGGGCCAAGAAGG  
AGGTGATCTGGTCCATCGTGGGCGCGCAGGCCACGGAGCAGGGCGACTGCTCCAAGTTCAAGGCCGGCATCCCGCA  
CTGCTGCAAGCGGACGCCCGCCGTGGTGGACCTGCTCCCGGGCGTGCCTACAACCAGCAGATCGCCAACCTGCTGCA  
AGGCCGGCGTGGTGTGCGCGTACGGGCAGGACCAGGCGGGGTCCGTCTCCGCGTTCAGGTCTCCGTCGGCCCTCGCC  
GGCACCACCAACAAGACGGTGAAGCTGCCAAGAACTTACCATCATGGGGCCCGGGCCAGGGTACACCTGCGGGCC  
GGCGACGATCGTGGTCCACCGTGTACTGGACGCTGACCACCGCGCGGACGCAGGGCGCTCATGACGTGGACC  
GTCACCTGCACCTATTCGACGAGCTGGCGTCCAAGTACCCGCTCTGCTGCGTCTCCTTCTCCTCTTCTACAACGACAC  
CATCGTGCCGTGCGCACGGTGCAGCGTGCAGGCTGCGGCCACGGCGGCCACGCCGGGCGGGAGGGTGCATCGAGGG  
GGACTCCAAGCGCGCGTGTGCCCCGGGTGAACACGCCGCGCAAGGACGGGCAGGGCGTCTGTCAGTGCACGCCG  
CACATGTGCCCCATCCGGGTGCACTGGCACGTCAAGCTCAACTACAAGGACTACTGGCGGCCAAGATCGCCATCACC  
AACTTCAACTACCGGATGAACTACACGCAGTGGACGCTCGTGGCGCAGCACCCCAACCTGGACAACGTACCCGAGGT  
CTTCAGCTTCCAGTACAAGCCGCTGCTACCATACGGCAGCATCAATGACACTGGCATGTTCTACGGGGCTCAAGTTCTAC  
AACGACCTGCTCATGGAGGCCGGCCCGTTCGGCAACGTGCAGTCCGAGGTGCTCATGCGCAAGGACGCCAGGACCTT  
CACCTCAGCCAGGGCTGGGCCTTCCCGCGCAAGATCTACTTCAACGGCGACGAGTGCAAGATGCCACCGCCGGACTC  
CTACCCCTACCTGCCAACGCCGCGCCCGCCGTCGCTCGCAGTGCATCGTGTCCGCCGCCGCTTCTACTGGCGCTG  
CTCCTGGTAGCATGACCATGACCGACCAGGGCCTCCATTTCTCCTTTGTTTCCTTCCACCTCTCATCTGTGCGCGTCTT  
CAATCCCATTCCCATGATCCCATCCCGTGGGCAGGGGGCAGCAGAGTAGGCAGGGCATAATTGGTTGCCAAGACTTCA  
AACTTGGGTTTTGCTTCGCTTAATTGCTTCGTGAGAGGGAAACTGTCATGCACTGTATGTAATGTAACCTCCAGTTG  
CAGGTCGTGAGATCCCAAGACAATCAGGCTGGCAGACTTTTTGGGTCTGCAACTACTATTAGAGAGCCTGCCTGAGCG  
AGAGAGAGGGGGAAAAAAGCAGACATATAGAGCATAACAGGTTTTCTGTTATTTGTTCTGTAAACATAATGCAGA  
TACTCTGTTCAAATGATATACGAATC

**Amplicon = 87 bp**

## References

- 1 Hoang, N. V. *Analysis of genes controlling biomass traits in the genome of sugarcane (Saccharum spp. hybrids)* PhD Degree thesis, The University of Queensland, (2017).
